# Supplementary material
Source: PubMed Central journal article supplement (PMC6126987)
Supplement: NIHMS980787-supplement-Supp_Table_1.pdf [file NIHMS980787-supplement-Supp_Table_1.pdf]

**Supplementary Table 1. Transgenic strains used in this study.** The strains are ordered as they appear in each figure and, where relevant, are also given a descriptive name.

**Figure 1**

| Strain name          | Mutant background    | Array name      | DNA on array                                                                                                                                                        |
|----------------------|----------------------|-----------------|---------------------------------------------------------------------------------------------------------------------------------------------------------------------|
| OH13575<br>"PHB>AVA" | <i>him-5 (e1490)</i> | <i>otls612</i>  | <i>MVC12 (flp-18p::nlg-1::gfp11) 15ng/ul, MVC6 (gpa-6p::nlg-1::gfp1-10) 15ng/ul, MVC11 (flp-18p::mcherry) 10ng/ul, MVC15 (nlp-1::mcherry) 10ng/ul, pRF4 50ng/ul</i> |
| OH14099<br>"PHA>AVG" | <i>him-5 (e1490)</i> | <i>otls630</i>  | <i>srg-13::BirA::nrx-1 25ng/ul, inx-18p::AP::nlg-1 25 ng/ul, inx-18p::wcherry 10ng/ul, unc-122::streptavidin::2xsfGFP 25 ng/ul, pRF4 50 ng/ul</i>                   |
| OH13577<br>"PHB>AVG" | <i>him-5 (e1490)</i> | <i>otls614</i>  | <i>inx-18p::nlg-1::gfp11 30ng/ul, MVC6 (gpa-6p::nlg-1::gfp1-10) 30ng/ul, MVC15 (nlp-1::mcherry) 5ng/ul, inx-18p::wcherry 10ng/ul, pRF4 50ng/ul</i>                  |
| OH13691<br>"AVG>DA9" | <i>him-5 (e1490)</i> | <i>otEx6342</i> | <i>inx-18p::nlg-1::gfp1-10 30ng/ul, pEVL194 (acr-2::nlg-1::gfp11) 30ng/ul, inx-18p::wCherry 15 ng/ul; pRF4 50ng/ul</i>                                              |

**Figure 2**

|         |                                    |  |  |
|---------|------------------------------------|--|--|
| OH15339 | <i>tax-4 (p678); him-5 (e1490)</i> |  |  |
| CB4088  | <i>him-5 (e1490)</i>               |  |  |

**Figure 3**

|                      |                      |                |                                                    |
|----------------------|----------------------|----------------|----------------------------------------------------|
| OH13575<br>"PHB>AVA" | <i>him-5 (e1490)</i> | <i>otls612</i> | <i>MVC12 (flp-18p::nlg-1::gfp11) 15ng/ul, MVC6</i> |
|----------------------|----------------------|----------------|----------------------------------------------------|

|                                                                    |                                     |                            |                                                                                                                                                                                                    |
|--------------------------------------------------------------------|-------------------------------------|----------------------------|----------------------------------------------------------------------------------------------------------------------------------------------------------------------------------------------------|
|                                                                    |                                     |                            | <i>(gpa-6p::nlg-1::gfp1- 10)</i><br>15ng/ul, MVC11 ( <i>flp-18p::mcherry</i> ) 10ng/ul, MVC15 ( <i>nlp- 1::mcherry</i> ) 10ng/ul, pRF4 50ng/ul                                                     |
| OH14099<br>“PHA>AVG”                                               | <i>him-5 (e1490)</i>                | <i>otls630</i>             | <i>srg-13::BirA::nrx-1</i><br>25ng/ul, <i>inx-18p::AP::nlg-1</i> 25 ng/ul, <i>inx-18p::wcherry</i> 10ng/ul, <i>unc-122::streptavidin::2xsfGFP</i> 25 ng/ul, pRF4 50 ng/ul                          |
| OH15576                                                            | <i>mod-5 (n3314); him-5 (e1490)</i> | <i>otls612</i>             | MVC12 ( <i>flp-18p::nlg-1::gfp11</i> ) 15ng/ul, MVC6 ( <i>gpa-6p::nlg-1::gfp1- 10</i> ) 15ng/ul, MVC11 ( <i>flp-18p::mcherry</i> ) 10ng/ul, MVC15 ( <i>nlp- 1::mcherry</i> ) 10ng/ul, pRF4 50ng/ul |
| OH15577                                                            | <i>mod-5 (n3314); him-5 (e1490)</i> | <i>otls630</i>             | <i>srg-13::BirA::nrx-1</i><br>25ng/ul, <i>inx-18p::AP::nlg-1</i> 25 ng/ul, <i>inx-18p::wcherry</i> 10ng/ul, <i>unc-122::streptavidin::2xsfGFP</i> 25 ng/ul, pRF4 50 ng/ul                          |
| OH15400                                                            | <i>him-5 (e1490)</i>                | <i>nls107</i>              | <i>tbh-1::gfp</i>                                                                                                                                                                                  |
| OH15401                                                            | <i>him-8 (e1489)</i>                | <i>otls517<sup>a</sup></i> | <i>tph-1::SL2::YFP::H2B</i><br>fosmid, <i>ttx-3::mCherry</i>                                                                                                                                       |
| OH15334<br>“PHB>AVA<br>ADF <sup>P</sup> :: <i>tph-1</i><br>line 1” | <i>otls612; him-5 (e1490)</i>       | <i>otEx7142</i>            | pKA805 [ <i>psrh-142::tph-1::GFP</i> ] <sup>p</sup> , <i>ttx-3::GFP</i>                                                                                                                            |
| OH15212<br>“PHB>AVA<br>ADF <sup>P</sup> :: <i>tph-1</i><br>line 2” | <i>otls612; him-5 (e1490)</i>       | <i>otEx7063</i>            | pKA805 [ <i>psrh-142::tph-1::GFP</i> ] <sup>p</sup> , <i>ttx-3::GFP</i>                                                                                                                            |
| OH15342<br>“PHB>AVA<br>NSM <sup>P</sup> :: <i>tph-1</i>            | <i>otls612; him-5 (e1490)</i>       | <i>otEx7147</i>            | pKA807 [ <i>pceh-2::tph-1::GFP</i> ] <sup>p</sup> , <i>ttx-3::GFP</i>                                                                                                                              |

|                                                                    |                                               |                             |                                                                                                                                                                       |
|--------------------------------------------------------------------|-----------------------------------------------|-----------------------------|-----------------------------------------------------------------------------------------------------------------------------------------------------------------------|
| <b>line 1”</b>                                                     |                                               |                             |                                                                                                                                                                       |
| OH15294<br>“PHB>AVA<br>NSM <sup>P</sup> :: <i>tph-1</i><br>line 2” | <i>otls612; him-5</i><br>(e1490)              | <i>otEx7123</i>             | <i>pKA807 [pceh-2::tph-1::GFP]<sup>b</sup>, ttx-3::GFP</i>                                                                                                            |
| OH15343<br>“PHA>AVG<br>ADF <sup>P</sup> :: <i>tph-1</i><br>line 1” | <i>otls630; him-5</i><br>(e1490)              | <i>otEx7148</i>             | <i>pKA805 [psrh-142::tph-1::GFP]<sup>b</sup>, ttx-3::GFP</i>                                                                                                          |
| OH15295<br>“PHA>AVG<br>ADF <sup>P</sup> :: <i>tph-1</i><br>line 2” | <i>otls630; him-5</i><br>(e1490)              | <i>otEx7124</i>             | <i>pKA805 [psrh-142::tph-1::GFP]<sup>b</sup>, ttx-3::GFP</i>                                                                                                          |
| OH15344<br>“PHA>AVG<br>NSM <sup>P</sup> :: <i>tph-1</i><br>line 1” | <i>otls630; him-5</i><br>(e1490)              | <i>otEx7149</i>             | <i>pKA807 [pceh-2::tph-1::GFP]<sup>b</sup>, ttx-3::GFP</i>                                                                                                            |
| OH15345<br>“PHA>AVG<br>NSM <sup>P</sup> :: <i>tph-1</i><br>line 2” | <i>otls630; him-5</i><br>(e1490)              | <i>otEx7150</i>             | <i>pKA807 [pceh-2::tph-1::GFP]<sup>b</sup>, ttx-3::GFP</i>                                                                                                            |
| OH15041<br>“ <i>lim-4</i><br>PHB>AVA”                              | <i>lim-4 (ky403);</i><br><i>him-5 (e1490)</i> | <i>otls612</i>              | <i>MVC12 (flp-18p::nlg-1::gfp11) 15ng/ul, MVC6 (gpa-6p::nlg-1::gfp1- 10) 15ng/ul, MVC11 (flp-18p::mcherry) 10ng/ul, MVC15 (nlp- 1::mcherry) 10ng/ul, pRF4 50ng/ul</i> |
| OH15208<br>“ <i>lim-4</i><br>PHA>AVG”                              | <i>lim-4 (ky403);</i><br><i>him-5 (e1490)</i> | <i>otEx6347<sup>c</sup></i> | <i>srg-13::BirA::nrx-1 25ng/ul, inx-18p::AP::nlg-1 25 ng/ul, inx-18p::wcherry 10ng/ul, unc-122::streptavidin::2xsfGFP 25 ng/ul, pRF4 50 ng/ul</i>                     |

<sup>a</sup>*otls517* is a *tph-1* transcriptional fosmid reporter, containing ~36kb of the genomic locus surrounding *tph-1* (presumed to contain all regulatory information) and with *tph-1* uniquely tagged with YFP.

<sup>b</sup>pKA805 and pKA807 were gifts from Kaveh Ashrafi.

<sup>c</sup>The extrachromosomal array for labeling PHA>AVG connectivity was used here due to genetic linkage between *lim-4* and *otls630*.

**Figure 4**

|                                                  |                                          |                |                                                                                                                                                                                                  |
|--------------------------------------------------|------------------------------------------|----------------|--------------------------------------------------------------------------------------------------------------------------------------------------------------------------------------------------|
| OH14916<br>“ <b>ser-1</b><br><b>PHB&gt;AVA</b> ” | <i>ser-1 (ok345);<br/>him-5 (e1490)</i>  | <i>otIs612</i> | MVC12 ( <i>flp-18p::nlg-1::gfp11</i> ) 15ng/ul, MVC6 ( <i>gpa-6p::nlg-1::gfp1-10</i> ) 15ng/ul, MVC11 ( <i>flp-18p::mcherry</i> ) 10ng/ul, MVC15 ( <i>nlp-1::mcherry</i> ) 10ng/ul, pRF4 50ng/ul |
| OH14907<br>“ <b>ser-4</b><br><b>PHB&gt;AVA</b> ” | <i>ser-4 (ok512);<br/>him-5 (e1490)</i>  | <i>otIs612</i> | MVC12 ( <i>flp-18p::nlg-1::gfp11</i> ) 15ng/ul, MVC6 ( <i>gpa-6p::nlg-1::gfp1-10</i> ) 15ng/ul, MVC11 ( <i>flp-18p::mcherry</i> ) 10ng/ul, MVC15 ( <i>nlp-1::mcherry</i> ) 10ng/ul, pRF4 50ng/ul |
| OH14906<br>“ <b>ser-5</b><br><b>PHB&gt;AVA</b> ” | <i>ser-5 (ok3087);<br/>him-5 (e1490)</i> | <i>otIs612</i> | MVC12 ( <i>flp-18p::nlg-1::gfp11</i> ) 15ng/ul, MVC6 ( <i>gpa-6p::nlg-1::gfp1-10</i> ) 15ng/ul, MVC11 ( <i>flp-18p::mcherry</i> ) 10ng/ul, MVC15 ( <i>nlp-1::mcherry</i> ) 10ng/ul, pRF4 50ng/ul |
| OH14907<br>“ <b>ser-7</b><br><b>PHB&gt;AVA</b> ” | <i>ser-7(tm1325);<br/>him-5 (e1490)</i>  | <i>otIs612</i> | MVC12 ( <i>flp-18p::nlg-1::gfp11</i> ) 15ng/ul, MVC6 ( <i>gpa-6p::nlg-1::gfp1-10</i> ) 15ng/ul, MVC11 ( <i>flp-18p::mcherry</i> ) 10ng/ul, MVC15 ( <i>nlp-1::mcherry</i> ) 10ng/ul, pRF4 50ng/ul |
| OH15578<br>“ <b>mod-1</b><br><b>PHB&gt;AVA</b> ” | <i>mod-1 (ok103);<br/>him-5 (e1490)</i>  | <i>otIs612</i> | MVC12 ( <i>flp-18p::nlg-1::gfp11</i> ) 15ng/ul, MVC6 ( <i>gpa-6p::nlg-1::gfp1-10</i> ) 15ng/ul, MVC11 ( <i>flp-18p::mcherry</i> ) 10ng/ul, MVC15 ( <i>nlp-1::mcherry</i> ) 10ng/ul, pRF4 50ng/ul |
| OH14894<br>“ <b>ser-4</b><br><b>PHA&gt;AVG</b> ” | <i>ser-4 (ok512);<br/>him-5 (e1490)</i>  | <i>otIs630</i> | <i>srg-13::BirA::nrx-1</i> 25ng/ul, <i>inx-18p::AP::nlg-1</i> 25 ng/ul, <i>inx-18p::wcherry</i> 10ng/ul, <i>unc-122::streptavidin::2xsfGFP</i> 25 ng/ul, pRF4 50 ng/ul                           |
| OH14983<br>“ <b>ser-5</b><br><b>PHA&gt;AVG</b> ” | <i>ser-5 (ok3087);<br/>him-5 (e1490)</i> | <i>otIs630</i> | <i>srg-13::BirA::nrx-1</i> 25ng/ul, <i>inx-18p::AP::nlg-1</i> 25 ng/ul, <i>inx-18p::wcherry</i> 10ng/ul,                                                                                         |

|                                                          |                                              |                 |                                                                  |
|----------------------------------------------------------|----------------------------------------------|-----------------|------------------------------------------------------------------|
|                                                          |                                              |                 | <i>unc-122::streptavidin::2xsfGFP</i><br>25 ng/ul, pRF4 50 ng/ul |
| OH15289<br>“PHB <sup>P</sup> :: <i>ser-4</i><br>PHB>AVA” | <i>ser-4 (ok512); otIs612; him-5 (e1490)</i> | <i>otEx7120</i> | <i>gpa-6p::ser-4::SL2::tagRFP, ttx-3::GFP</i>                    |
| OH15346<br>“PHB <sup>P</sup> :: <i>ser-4</i><br>PHB>AVA” | <i>ser-4 (ok512); otIs612; him-5 (e1490)</i> | <i>otEx7151</i> | <i>gpa-6p::ser-4::SL2::tagRFP, ttx-3::GFP</i>                    |
| OH15162<br>“AVA <sup>P</sup> :: <i>ser-4</i><br>PHB>AVA” | <i>ser-4 (ok512); otIs612; him-5 (e1490)</i> | <i>otEx7043</i> | <i>flp-18p::ser-4::SL2::tagRFP, ttx-3::GFP</i>                   |
| OH15279<br>“AVA <sup>P</sup> :: <i>ser-4</i><br>PHB>AVA” | <i>ser-4 (ok512); otIs612; him-5 (e1490)</i> | <i>otEx7110</i> | <i>flp-18p::ser-4::SL2::tagRFP, ttx-3::GFP</i>                   |
| OH15228<br>“PHA <sup>P</sup> :: <i>ser-4</i><br>PHA>AVG” | <i>ser-4 (ok512); otIs630; him-5 (e1490)</i> | <i>otEx7077</i> | <i>srg-13p::ser-4::SL2::tagRFP, ttx-3::GFP</i>                   |
| OH15229<br>“PHA <sup>P</sup> :: <i>ser-4</i><br>PHA>AVG” | <i>ser-4 (ok512); otIs630; him-5 (e1490)</i> | <i>otEx7078</i> | <i>srg-13p::ser-4::SL2::tagRFP, ttx-3::GFP</i>                   |
| OH15348<br>“AVG <sup>P</sup> :: <i>ser-4</i><br>PHA>AVG” | <i>ser-4 (ok512); otIs630; him-5 (e1490)</i> | <i>otEx7152</i> | <i>inx-18p::SER-4::SL2::tagRFP, ttx-3::GFP</i>                   |
| OH15161<br>“AVG <sup>P</sup> :: <i>ser-4</i><br>PHA>AVG” | <i>ser-4 (ok512); otIs630; him-5 (e1490)</i> | <i>otEx7042</i> | <i>inx-18p::SER-4::SL2::tagRFP, ttx-3::GFP</i>                   |
| OH15349<br>“PHB <sup>P</sup> :: <i>ser-4</i><br>PHA>AVG” | <i>ser-4 (ok512); otIs630; him-5 (e1490)</i> | <i>otEx7153</i> | <i>gpa-6p::ser-4::SL2::tagRFP, ttx-3::GFP</i>                    |
| OH15350<br>“PHB <sup>P</sup> :: <i>ser-4</i><br>PHA>AVG” | <i>ser-4 (ok512); otIs630; him-5 (e1490)</i> | <i>otEx7154</i> | <i>gpa-6p::ser-4::SL2::tagRFP, ttx-3::GFP</i>                    |
| OH15351<br>“ <i>osm-6::gfp</i> ”                         | <i>him-8 (e1489)</i>                         | <i>oyls59</i>   | <i>osm-6::gfp</i>                                                |

### Extended Data Figures:

All strains used in extended data figures have been detailed in main text figures. In brief:

**Extended Data Fig. 1:** OH13575 *otIs612; him-5 (e1490)*, OH14099 *otIs630; him-5 (e1490)*, OH13577 *otIs614; him-5 (e1490)*, OH13691 *otEx6342; him-5 (e1490)*

**Extended Data Fig. 2:** OH15339 *tax-4 (p678); him-5 (e1490)*, CB4088 *him-5 (e1490)*

**Extended Data Fig. 3:** OH13575 *otIs612; him-5 (e1490)*, OH14099 *otIs630; him-5 (e1490)*, OH15576 *mod-5 (n3314); otIs612; him-5 (e1490)*, OH15577 *mod-5 (n3314)*;

*otls630; him-5 (e1490)*, OH15582 *cat-2 (e1112)*; *otls612; him-5 (e1490)*, OH15583 *cat-2 (e1112)*; *otls630; him-5 (e1490)*

**Extended Data Fig. 4:** OH15400 *nls107; him-5 (e1490)*, OH15401 *otls517; him-8 (e1489)*

**Extended Data Fig. 5:** OH15400 *nls107; him-5 (e1490)*, OH15584 *tbh-1 (n3247)*; *otls517; him-8 (e1489)*, OH15585 *ser-6 (tm2146)*; *otls517; him-8 (e1489)*

**Extended Data Fig. 6:** OH13575 *otls612; him-5 (e1490)*, OH14099 *otls630; him-5 (e1490)*, OH14979 *tph-1 (n4622)*; *otls612; him-5 (e1490)*, OH15083 *ttx-3 (ot22)*; *unc-86 (n846)*; *otls612; him-5 (e1490)*

**Extended Data Fig. 7:** OH13575 *otls612; him-5 (e1490)*, OH14099 *otls630; him-5 (e1490)*, OH14907 *ser-4 (ok512)*; *otls612; him-5 (e1490)*, OH14894 *ser-4 (ok512)*; *otls630; him-5 (e1490)*, OH15289 *otEx7120 ser-4 (ok512)*; *otls612; him-5 (e1490)*, OH15228 *otEx7077; ser-4 (ok512)*; *otls630; him-5 (e1490)*, OH15349 *otEx7153; ser-4 (ok512)*; *otls630; him-5 (e1490)*

**Extended Data Fig. 8:** OH14907 *ser-4 (ok512)*; *otls612; him-5 (e1490)*, OH14894 *ser-4 (ok512)*; *otls630; him-5 (e1490)*, OH15250 *ser-4 (ok512)*; *otls517; him-8 (e1489)*
